# Supplementary material for: Anode-Driven Controlled Release of Cathodic Fuel via pH Response for Smart Enzymatic Biofuel Cell
Source: PubMed Central journal article supplement — iScience. 2020 May 5;23(6):101133. doi: 10.1016/j.isci.2020.101133 (PMC7235283; doi:10.1016/j.isci.2020.101133), 2020-05-05
Supplement: mmc1.pdf [file mmc1.pdf]

iScience, Volume 23

## **Supplemental Information**

### **Anode-Driven Controlled Release of Cathodic Fuel via pH Response for Smart Enzymatic Biofuel Cell**

**Panpan Gai, Chengcheng Gu, Xinke Kong, and Feng Li**

# Supporting Information

## Transparent Methods

**Materials and Reagents.** Flavin adenine dinucleotide (FAD)-dependent glucose dehydrogenase (GDH) was purchased from Toyobo Co., Ltd. (Japan). 2-Methylimidazole was obtained from Adamas Reagent Co., Ltd. 1-Ethyl-3-(3-dimethyl-aminopropyl) carbodiimide hydrochloride (EDC), *N*-hydroxysuccinimide (NHS), and 3-triethoxysilylpropylamine (APTES) were all purchased from Sigma-Aldrich (St. Louis, MO, U.S.A.). Zinc acetate and chloroauric acid ( $\text{HAuCl}_4 \cdot 4\text{H}_2\text{O}$ ) were commercially available from Shanghai Chemical Reagent Co., Ltd. (Shanghai, China).  $\beta$ -D-Glucose was obtained from Tokyo Chemical Industry Co., Ltd. (Japan). AuNPs were prepared according to the literature by adding a sodium citrate solution to a boiling  $\text{HAuCl}_4$  solution. (Li et al. 2010) All reagents were of analytical grade and were used as received without further purification. Ultrapure water (resistivity  $>18.2 \text{ M}\Omega \text{ cm}$  at  $25^\circ\text{C}$ ) obtained from a Milli-Q water purification system (Millipore Corp, Bedford, MA, U.S.A.) was used for all the experiments.

**Apparatus.** Transmission electron microscopy (TEM) images were recorded on an HT7700 microscope (Hitachi, Japan) operated at 100 kV. Scanning electron microscopy (SEM)-energy dispersive spectroscopy (EDS) was measured on a JEOL 7500F SEM (Hitachi, Japan). X-ray diffraction (XRD) patterns were recorded from a D8 ADVANCE (Bruker, Germany). Electrochemical impedance spectroscopy (EIS) was carried out on an Autolab PGSTAT 302N electrochemical analyzer (Metrohm Autolab, The Netherlands), in which the frequency range was 0.1 Hz-100 kHz, and the electrolyte solution was 2.5 mM of  $[\text{Fe}(\text{CN})_6]^{3-}/[\text{Fe}(\text{CN})_6]^{4-}$  probe solution. Cyclic voltammetry (CV), differential pulse voltammetry (DPV), linear sweep voltammetry (LSV), and the open-circuit voltage ( $E^{\text{OCV}}$ ) of EBFC measurements were performed on a CHI 660E

electrochemical workstation (Shanghai CH Instrument Co., China) using a three-electrode system: the prepared anode or cathode a Pt wire and an Ag/AgCl were used as the working electrode, the counter electrode, the reference electrode, respectively. All experiments were carried out at room temperature ( $25 \pm 1^\circ\text{C}$ ).

**Synthesis of  $[\text{Fe}(\text{CN})_6]^{3-}@\text{ZIF-8}$ .** Briefly, 1.4 M of 2-methylimidazole and 50 mM of zinc acetate were dissolved in ultrapure water with stirring gently at room temperature. Then, 3 mM of  $[\text{Fe}(\text{CN})_6]^{3-}$  was added quickly and stirred for 2 h. During this process,  $[\text{Fe}(\text{CN})_6]^{3-}$  could be encapsulated in the ZIF-8. Afterwards, the mixture was centrifuged (6000 rpm, 5 min) and washed with ultrapure water at least three times to remove the unloaded  $[\text{Fe}(\text{CN})_6]^{3-}$ . Finally, the obtained  $[\text{Fe}(\text{CN})_6]^{3-}@\text{ZIF-8}$  was resuspended into ultrapure water and stored at  $4^\circ\text{C}$  for further use.

**Preparation of the Positively Charged Cathode and the GDH/AuNPs Anode.** The washed indium tin oxide (ITO) was immersed in 1 mM of APTES solution for 5 h at room temperature. Then excess APTES was rinsed with ultrapure water. After these pretreatment procedures, a positively charged cathode was obtained. (Gai et al. 2017) Meanwhile, 30  $\mu\text{L}$  of the prepared AuNPs (50 nM) was coated on the surface of the ITO electrode and dried at  $37^\circ\text{C}$  for 2 h. Subsequently, the substrate electrode was immersed in the solution containing 10  $\text{mg mL}^{-1}$  of EDC/NHS for 30 min to activate the carboxyl group of AuNPs. After being rinsed with ultrapure water to eliminate excess EDC and NHS, the activated electrode was incubated with 20  $\mu\text{L}$  of GDH solution at  $4^\circ\text{C}$  overnight to obtain the GDH/ AuNPs anode.

**Fabrication of EBFC.** The anode-driven membrane-less EBFC was constructed by using the GDH/AuNPs anode and the positively charged cathode, and operated at room temperature. The supporting electrolyte was 1 mL of 10 mM NaCl solution (pH 7.4) containing 100  $\mu\text{L}$  of  $[\text{Fe}(\text{CN})_6]^{3-}$

@ZIF-8. The  $E^{OCV}$  of EBFC was tested by connecting the anode and cathode placed in the electrolytic cell. Polarization curves of the EBFC were measured by linear sweep voltammetry starting from the open-circuit value at a scan rate of  $10 \text{ mV s}^{-1}$ . The relationship of power output and the current was calculated based on the polarization curve by the formula of  $P=UI$ . The as-proposed EBFC was stored at  $4^{\circ}\text{C}$  when not in use.

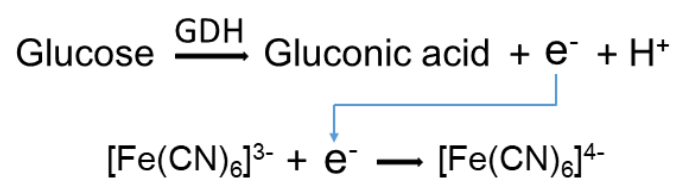

**Equation S1. Illustration of the oxidation of glucose and the reduction of  $[\text{Fe}(\text{CN})_6]^{3-}$ , related to Scheme 1.**

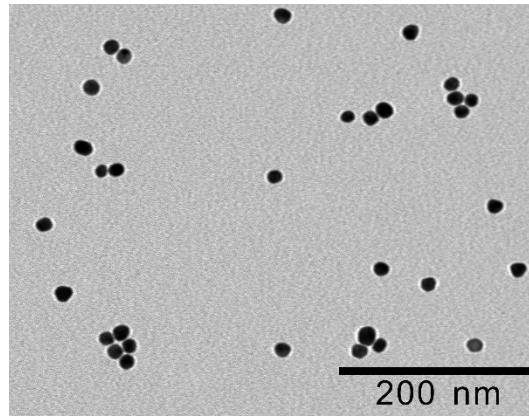

**Figure S1. TEM image of AuNPs, related to Figure 1.**

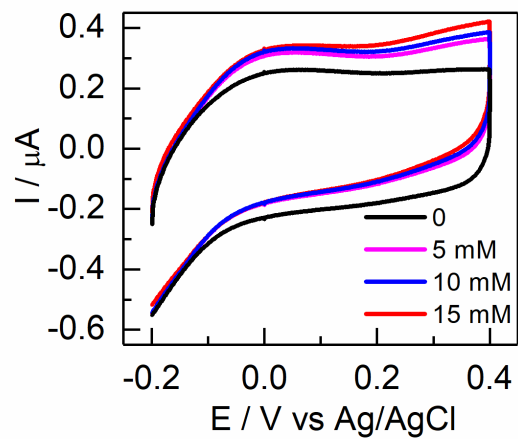

**Figure S2. Study of the Anode, related to Figure 1.** CVs of the GDH/AuNPs/ITO anode in 10 mM NaCl solution (pH 7.4) with different glucose concentrations.

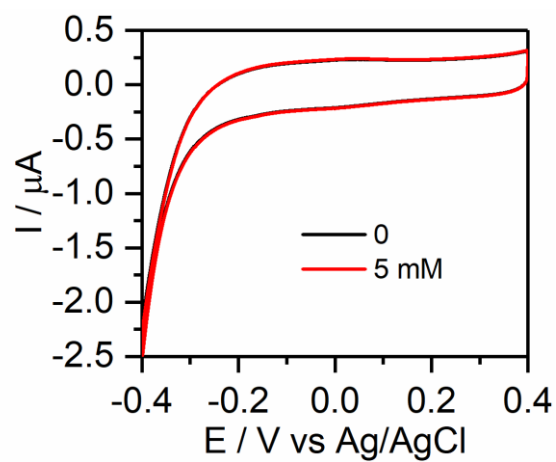

**Figure S3. Study of the Anode, related to Figure 1.** CVs of the AuNPs/ITO in 10 mM NaCl solution (pH 7.4) with different glucose concentrations.



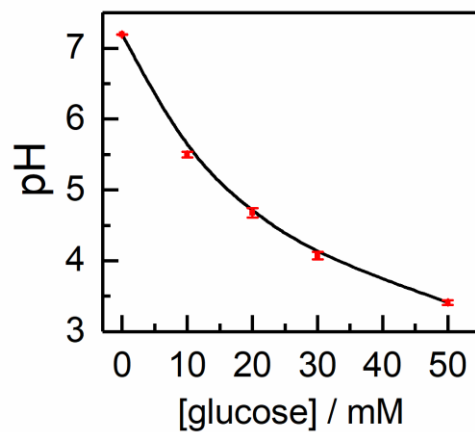

**Figure S4.** The relationship between pH current values and different glucose concentrations, related to Figure 3. Standard deviation was obtained from three independent measurements.

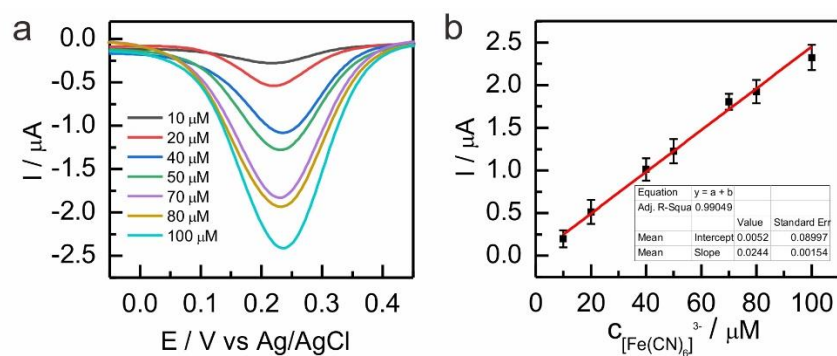

**Figure S5. The Relationship Between Current Value and  $[\text{Fe}(\text{CN})_6]^{3-}$  Concentration, related to Figure 3.** (a) DPV curves of the different  $[\text{Fe}(\text{CN})_6]^{3-}$  concentrations. (b) The linear relationship between current value and  $[\text{Fe}(\text{CN})_6]^{3-}$  concentration from 10 to 100  $\mu\text{M}$ . Standard deviation was obtained from three independent measurements.

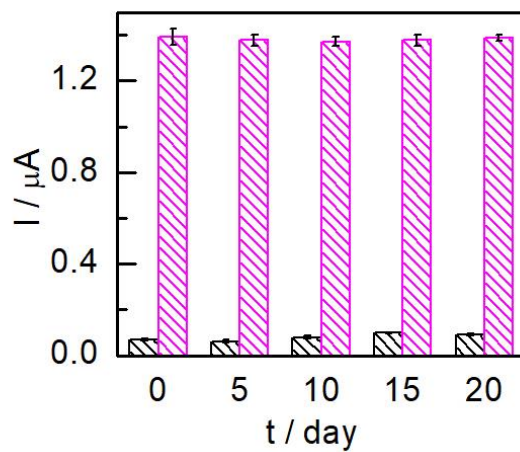

**Figure S6. Stability Analysis, related to Figure 3.** Stability analysis of the  $[\text{Fe}(\text{CN})_6]^{3-}@\text{ZIF-8}$  nanocarriers in the presence and absence of 50 mM glucose concentration in 20 days. Standard deviation was obtained from three independent measurements.

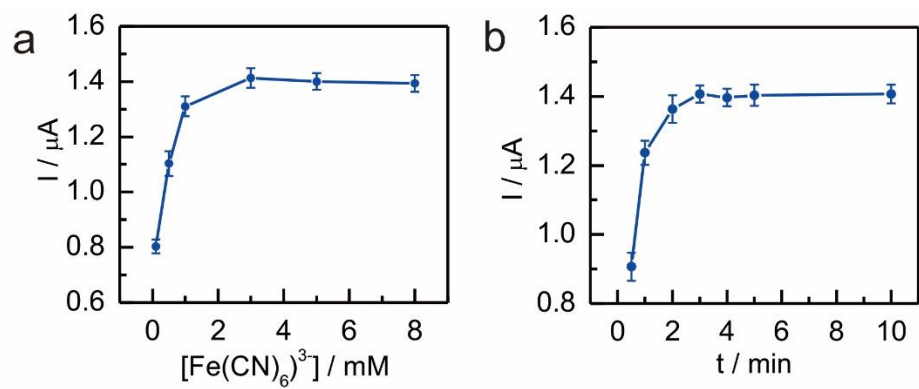

**Figure S7. Optimization of [Fe(CN)<sub>6</sub><sup>3-</sup> Concentration and the Release Time, related to Figure 3.** Effect of (a) [Fe(CN)<sub>6</sub><sup>3-</sup> concentration, (b) ZIF-8@[Fe(CN)<sub>6</sub><sup>3-</sup> release time. Standard deviation was obtained from three independent measurements.

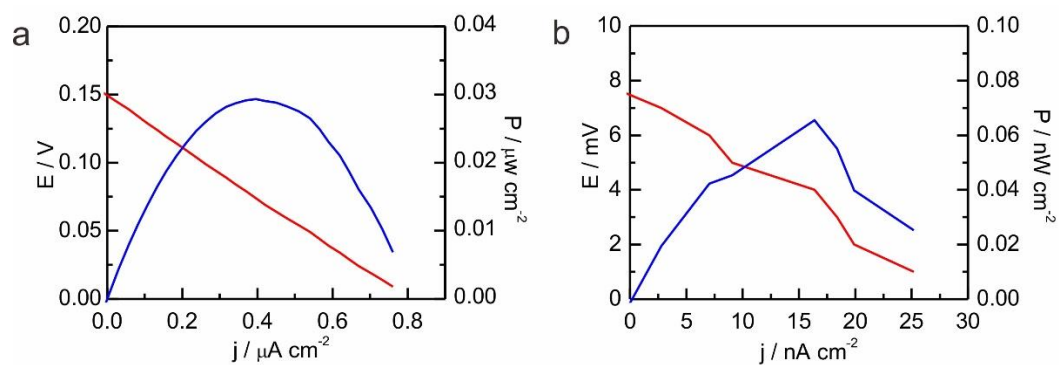

**Figure S8. Comparison of Different EBFCs, related to Figure 4.** The polarization curves and power output curves of the EBFCs with (a) or without (b) membrane responses with the same concentrations of glucose (50 mM) and  $[\text{Fe}(\text{CN})_6]^{3-}$  (58.5  $\mu\text{M}$ ).

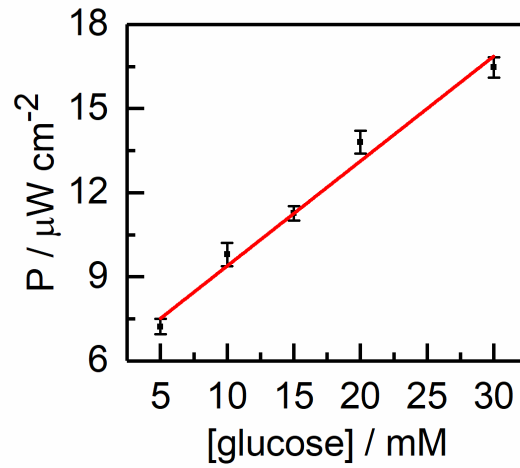

**Figure S9. Investigation of the Linear Relationship between Power Output and Glucose Concentration, related to Figure 4.** The linear relationship between power output and glucose concentration from 5 to 30 mM. Standard deviation was obtained from three independent measurements.

Gai, P.P., Gu, C.C., Li, H.Y., Sun, X.Z., Li, F. (2017). Ultrasensitive ratiometric homogeneous electrochemical microRNA biosensing via target-triggered Ru(III) release and redox recycling. *Anal. Chem.* 89, 12293-12298.

Li, F., Feng, Y., Dong, P., Tang, B. (2010). Gold nanoparticles modified electrode via a mercapto-diazoaminobenzene monolayer and its development in DNA electrochemical biosensor. *Biosens. Bioelectron.* 25, 2084-2088.
